# Supplementary material
Source: PubMed Central journal article supplement (PMC9205175)
Supplement: NIHMS1810438-supplement-1.pdf [file NIHMS1810438-supplement-1.pdf]

## Supplemental Figures

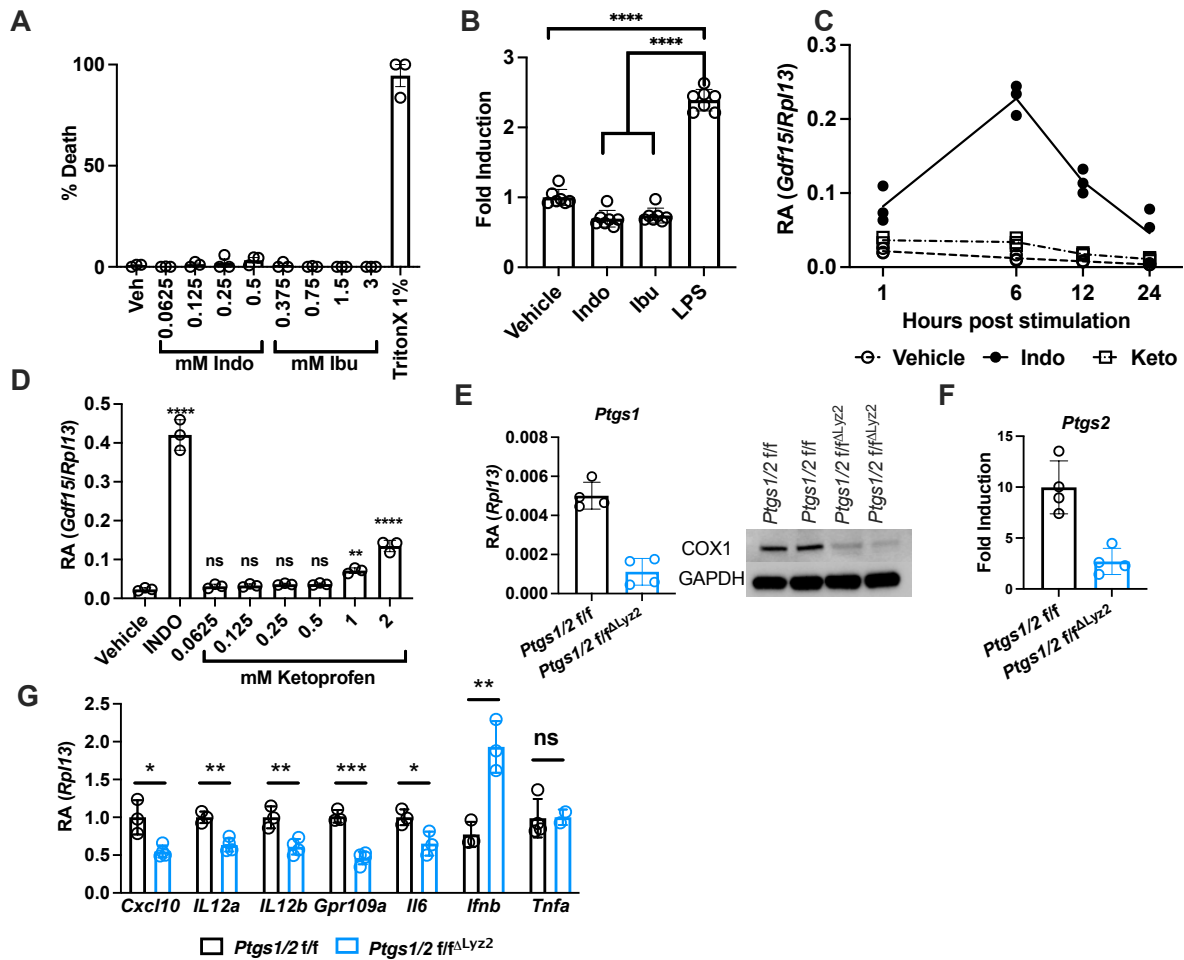

**Figure S1. Indomethacin induces GDF15 independent of cyclooxygenases, Related to Figure 1.** (A) LDH assay performed from the supernatants of BMDMs treated for 24 hours with increasing concentrations of indomethacin and ibuprofen (n=3 per group). (B) Fold change in reactive oxygen species following BMDM treatment with indomethacin, ibuprofen and LPS 5 hrs (n=7 per group). (C) *Gdf15* mRNA expression from BMDMs following treatment with vehicle, 0.5mM indomethacin or 0.5 mM ketoprofen diluted in 1% DMSO for 1, 6, 12 and 24 hours (n=3 per group). (D) *Gdf15* mRNA expression from BMDMs following 6h treatment with 0.5 mM indomethacin and increasing concentrations of ketoprofen diluted in 1% DMSO (n=3 per group). (E) *Ptgs1* mRNA expression and COX1 protein levels by Western Blot from BMDMs derived from *Ptgs1/2 f/f* or *Ptgs1/2 f/f<sup>LYZ2</sup>* (n=4 per group). (F) *Ptgs2* mRNA expression from BMDMs derived from *Ptgs1/2 f/f* or *Ptgs1/2 f/f<sup>LYZ2</sup>* mice that were treated with

indomethacin to induce *Cox2* expression (n=4 per group). (G) mRNA expression of the indicated prostaglandin-sensitive transcripts from BMDMs derived from *Ptgs1/2* f/f or *Ptgs1/2* f/f<sup>Lyz2</sup> mice that were treated with LPS for 3 hours (n=3 per group). All experiments are representative and repeated at least once. Statistics by ANOVA or t-test. Data are represented as mean ± standard deviation. \**P*<.05, \*\**P*<0.01, \*\*\**P*<.001, \*\*\*\**P*<.0001, ns *P*>.05

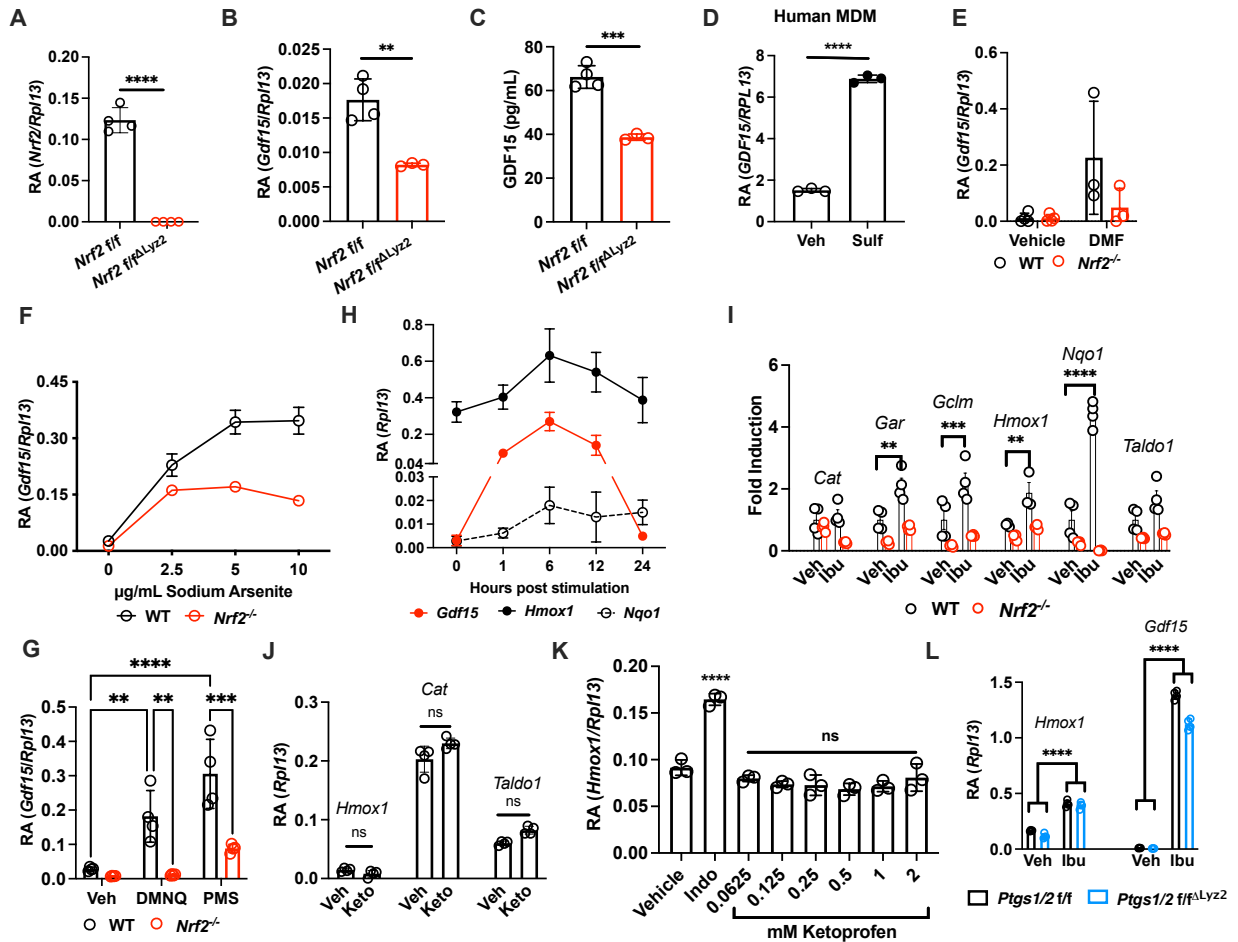

**Figure S2. NRF2 is necessary and sufficient for GDF15 secretion and some NSAIDs activate NRF2, Related to Figure 2.** (A) *Nrf2* and (B) *Gdf15* mRNA expression and (C) GDF15 protein levels from BMDMs derived from *Nrf2* f/f or *Nrf2* f/f<sup>ΔLy2</sup> (n=3-4 per group). (D) *GDF15* mRNA expression in human MDM at 6 hours post stimulation with 8.3 mg/mL sulforaphane (n=3 per group). (E) *Gdf15* mRNA expression from BMDMs at 6 hours stimulation with dimethylfumarate (n=3-4 per group). (F) *Gdf15* mRNA expression from BMDMs at the indicated doses of sodium arsenite at 6 hours post stimulation (n=3 per group). (G) *Gdf15* mRNA expression from BMDM 6 hours after stimulation with 2,3-dimethoxy-1,4-naphthalenedione (DMNQ), and phenazine methosulfate (PMS) (n=4 per group). (H) *Gdf15*, *Hmox1*, and *Nqo1* expression at the indicated timepoints after indomethacin stimulation in BMDM (n=4 per group). (I) Fold induction of *Cat*, *Gar*, *Gclm*, *Hmox1*, *Nqo1*, *Taldo1* mRNA expression in BMDMs derived from B6 and *Nrf2*<sup>-/-</sup> mice treated for 16 hours with vehicle or 1.5

mM ibuprofen diluted in 1% DMSO (n=4 per group). (J) mRNA expression of *Hmox1*, *Cat*, *Taldo1* from BMDMs derived from B6 mice treated with vehicle and 0.5 mM ketoprofen diluted in 1% DMSO (n=4 per group). (K) *Hmox1* mRNA expression from BMDMs derived from B6 mice treated for 16 hours with increasing doses of ketoprofen or 0.5 mM indomethacin diluted in 1% DMSO (n=3 per group). (L) *Hmox1* and *Gdf15* mRNA expression from BMDMs derived from *Ptgs1/2* f/f or *Ptgs1/2* f/f<sup>Lyz2</sup> mice treated with vehicle or 0.5 mM ibuprofen diluted in 1% DMSO (n=4 per group). All experiments are representative and repeated at least once. Statistics by ANOVA or t-test. Data are represented as mean ± standard deviation. \*\**P*<0.01, \*\*\**P*<.001, \*\*\*\**P*<.0001, ns *P*>.05



binding site for *Gdf15* and (C) the canonical NRF2 target gene *Nqo1*. The ARE consensus sequences are underlined and bolded.

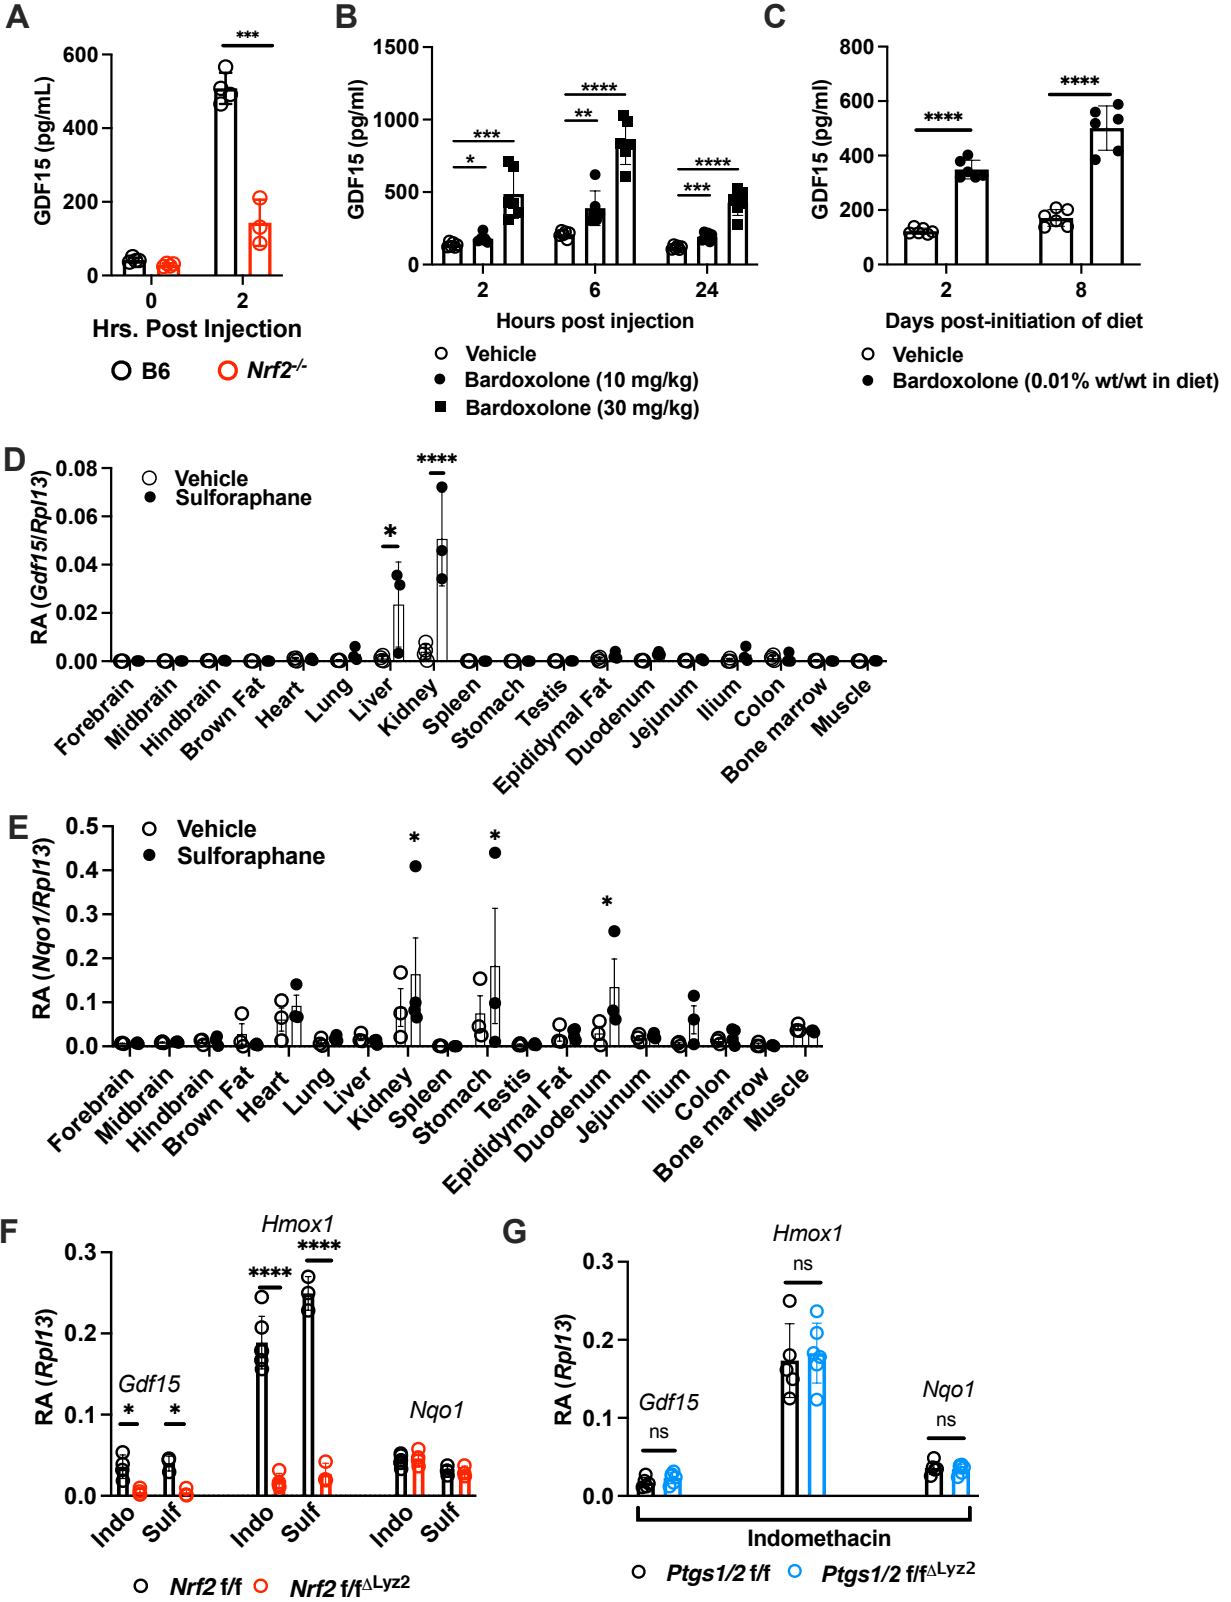

**Figure S4. Indomethacin activates Nrf2 target genes in a manner dependent on Nrf2, and independent of COX1/2, in *Lyz2* expressing cells *in vivo*, Related to Figure 3.** (A) Serum GDF15 protein levels after injection with vehicle or 25 mg/kg sulforaphane in B6 and *Nrf2*<sup>-/-</sup> animals (n=3-4 per group). (B) Serum GDF15 protein levels 2, 6, 24 hours post injection with vehicle or Bardoxolone (10 and 30 mg/kg) (n=6 per group). (C) Serum GDF15 levels in mice fed diet with 0.01% wt/wt Bardoxolone for 2 and 8 days (n=6 per group). *Gdf15* (D) and *Nqo1* (E) mRNA expression extracted from the organs of B6 mice 6h after injection with vehicle (EtOH) or 50 mg/kg sulforaphane (n=3 per group). (F) *Gdf15*, *Hmox1*, and *Nqo1* mRNA expression from the liver of *Nrf2* f/f or *Nrf2* f/f<sup>Lyz2</sup> mice 6h following intraperitoneal injection of 15 mg/kg indomethacin or 50 mg/kg sulforaphane (n=3-6 per group). (G) *Gdf15*, *Hmox1*, and *Nqo1* mRNA expression from the liver of *Ptgs1/2* f/f or *Ptgs1/2* f/f<sup>Lyz2</sup> mice 6h following intraperitoneal injection of 15 mg/kg indomethacin (n=5-6 per group). All experiments are representative and repeated at least once. Statistics by ANOVA. Data are represented as mean ± standard deviation. \**P*<.05, \*\**P*<0.01, \*\*\**P*<.001, \*\*\*\**P*<.0001, ns *P*>.05



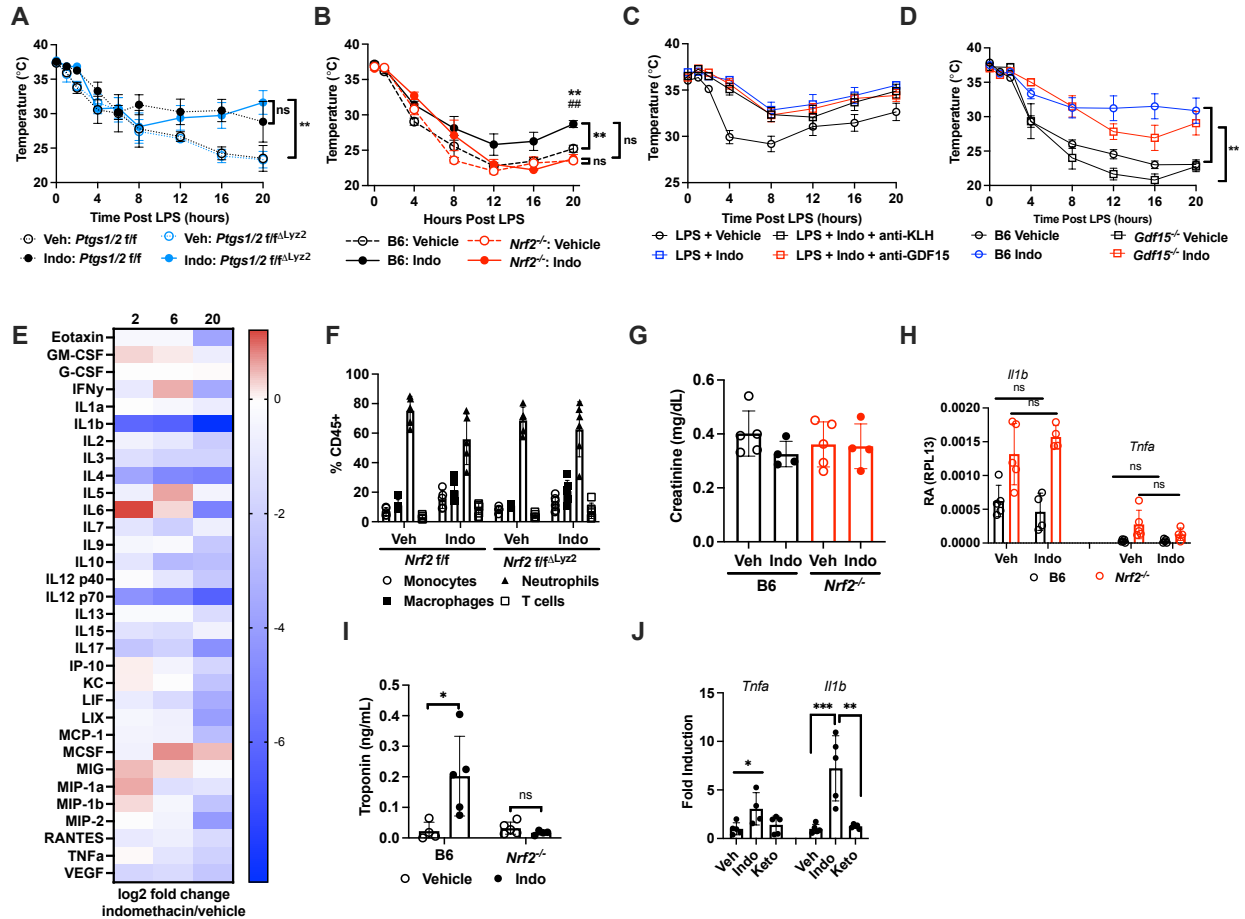

**Figure S5. Indomethacin reduces inflammation in endotoxemia and gout via an Nrf2 dependent, GDF15-independent and COX1/2 independent mechanism, Related to Figure 5.** Temperature curve of *Ptgs1/2* f/f (A) and *Nrf2*<sup>-/-</sup> (B) mice following intraperitoneal injection LPS and vehicle or indomethacin (AUC p < 0.0085 and 0.0210, respectively, n=4-5 per group). (C) Temperature curve for B6 animals challenged with LPS with or without indomethacin with or without pre-treatment with GDF15 blocking antibody or isotype control (KLH) (n=4-5 per group). (D) Temperature curve for *Gdf15*<sup>-/-</sup> and littermate control animals challenged with LPS with or without indomethacin (AUC p < 0.01) (n=6-9 per group). (E) Heat map of serum cytokine levels in B6 mice 2, 6, or 20 hours following intraperitoneal injection with LPS and vehicle or indomethacin, expressed as a log<sub>2</sub> fold change (n=5 per group). (F) Flow cytometry analysis of inflammatory cells composing the liver 20 hours following intraperitoneal injection with vehicle of indomethacin in *Nrf2* f/f or *Nrf2* f/f<sup>LY2Z</sup> mice (n=5-6 per group). (G) Serum creatinine levels 20 hours after intraperitoneal injection of LPS and vehicle or indomethacin in B6 and *Nrf2*<sup>-/-</sup> mice

(n=4-5 per group). (H) *Il1b* and *Tnfa* mRNA expression in the kidney of B6 and *Nrf2*<sup>-/-</sup> mice 20 hours following intraperitoneal injection LPS and vehicle or indomethacin (n=4-5 per group). (I) Serum troponin levels 20 hours following intraperitoneal injection of vehicle or indomethacin in B6 and *Nrf2*<sup>-/-</sup> mice (n=4-5 per group). (J) *Il1b* and *Tnfa* mRNA expression in the heart of B6 mice 24 hours following intraperitoneal injection LPS and vehicle, indomethacin or ketoprofen (n=5 per group). All experiments are representative and repeated at least once. Statistics by ANOVA. Data are represented as mean ± standard deviation. \**P*<.05, \*\**P*<0.01, \*\*\**P*<.001, ns *P*>.05

Table S1. Primer sequences used for identifying NRF2 binding sites in *Gdf1*, Related to Figure 2.

| Primer Name              | Primer Sequence        | mm9 coordinates                        |
|--------------------------|------------------------|----------------------------------------|
| 1 GTGACTCAGCA Con L      | GCTTGCCATCCGATTCCTT    | <a href="#">chr8:73167029+73167133</a> |
| 1 GTGACTCAGCA Con R      | CTCTGAGACAGGGCTCAACC   | <a href="#">chr8:73167029+73167133</a> |
| 2 TGCTGTGTCAT revcomp L  | GCTTCTCCTGTGCATGGTG    | <a href="#">chr8:73159549+73159640</a> |
| 2 TGCTGTGTCAT revcomp R  | CCTGGGTGCTTCACAGGA     | <a href="#">chr8:73159549+73159640</a> |
| 3 TACTGAGTCTT comp L     | TTATGGAAGGGGTCACATGG   | <a href="#">chr8:73162894+73163000</a> |
| 3 TACTGAGTCTT comp R     | CAGTCTGCGTGCCCAATA     | <a href="#">chr8:73162894+73163000</a> |
| 4 ACGGCTCAGTC Conrev L   | GCAGGCTGGAGCCTCATTA    | <a href="#">chr8:73137215+73137320</a> |
| 4 ACGGCTCAGTC Conrev R   | ACAGGGGCAGGTACAGGAAT   | <a href="#">chr8:73137215+73137320</a> |
| 5 ATGAATCTGCA Con L      | TGCTGGTAATGCATGCTAGTCT | <a href="#">chr8:73135846+73135949</a> |
| 5 ATGAATCTGCA Con R      | TGAGGTCAGAGAGAATGG     | <a href="#">chr8:73135846+73135949</a> |
| 6 CTGACTCAGCG Con L      | GGTAGGCTTCGGGAGAC      | <a href="#">chr8:73153996+73154097</a> |
| 6 CTGACTCAGCG Con R      | CCGGTGTCTGGTTTCTTCT    | <a href="#">chr8:73153996+73154097</a> |
| 7 ATGACCCGGCA Con L      | TCCCCATTCTATAAATGCAA   | <a href="#">chr8:73165844+73165950</a> |
| 7 ATGACCCGGCA Con R      | CTTTTGAATTCCTGGGGTGA   | <a href="#">chr8:73165844+73165950</a> |
| 8 ATGAGTCAGGA Con L      | CTCTCAATTGCCCTTGT      | <a href="#">chr8:73174403+73174501</a> |
| 8 ATGAGTCAGGA Con R      | CCAGCTCTGACGCCATGTA    | <a href="#">chr8:73174403+73174501</a> |
| 9 GGCTCAGTCAT revcomp L  | GCAGGCTGGAGCCTCATTA    | <a href="#">chr8:73137215+73137320</a> |
| 9 GGCTCAGTCAT revcomp R  | ACAGGGGCAGGTACAGGAAT   | <a href="#">chr8:73137215+73137320</a> |
| 10 TGCAGGGTCAT revcomp L | GTAGCCACGTGACAGGAACC   | <a href="#">chr8:73151874+73151983</a> |
| 10 TGCAGGGTCAT revcomp R | TGAGAGGAAGCCTGGTAAGG   | <a href="#">chr8:73151874+73151983</a> |
| 11 CTGCCTCAGCA Con L     | GGTCTCTGGAATCACCATCTC  | <a href="#">chr8:73136141+73136240</a> |
| 11 CTGCCTCAGCA Con R     | TACCAGCTGAGCCTCCCTAA   | <a href="#">chr8:73136141+73136240</a> |
| 12 TGCTGATTCT revcomp L  | CCAAGCACAGGGCTTAATTC   | <a href="#">chr8:73135704+73135801</a> |
| 12 TGCTGATTCT revcomp R  | AGGCAGGTTGCTTTGTCACT   | <a href="#">chr8:73135704+73135801</a> |
| 13 TGTTGGGTCAT revcomp L | CCCACAAGTGTAGGGAAGGA   | <a href="#">chr8:73148362+73148454</a> |
| 13 TGTTGGGTCAT revcomp R | TTCTGTCAATGCAGCCCTAA   | <a href="#">chr8:73148362+73148454</a> |
| 14 GTGACAAAGCA Con L     | CAGCGTTGGTACAACGCATA   | <a href="#">chr8:73135744+73135839</a> |
| 14 GTGACAAAGCA Con R     | AAATGAGGAACCGGTGTTG    | <a href="#">chr8:73135744+73135839</a> |
| 15 GTCTGAGTCAT revcomp L | TGCTCCAAAATGCTGCATAG   | <a href="#">chr8:73151141+73151242</a> |
| 15 GTCTGAGTCAT revcomp R | CTGCTCAGGAAGGAACTG     | <a href="#">chr8:73151141+73151242</a> |
| 16 GTGAGTCACCA Con L     | GTCACCCAGGAATTCAAAA    | <a href="#">chr8:73165930+73166023</a> |
| 16 GTGAGTCACCA Con R     | TGTGATCAAGTGGCATTCTCTT | <a href="#">chr8:73165930+73166023</a> |
| 17 TATTGAGTCCT comp L    | TGGATTACCTCTGGGACAG    | <a href="#">chr8:73148464+73148565</a> |
| 17 TATTGAGTCCT comp R    | CAGCCACTGCATTGAAACC    | <a href="#">chr8:73148464+73148565</a> |

Consensus (Con), Consensus reverse (Conrev), Reverse complementary (Revcomp), Compliment (Comp).
